# Supplementary material
Source: PubMed Central journal article supplement (PMC3025756)

Supplemental Figure III

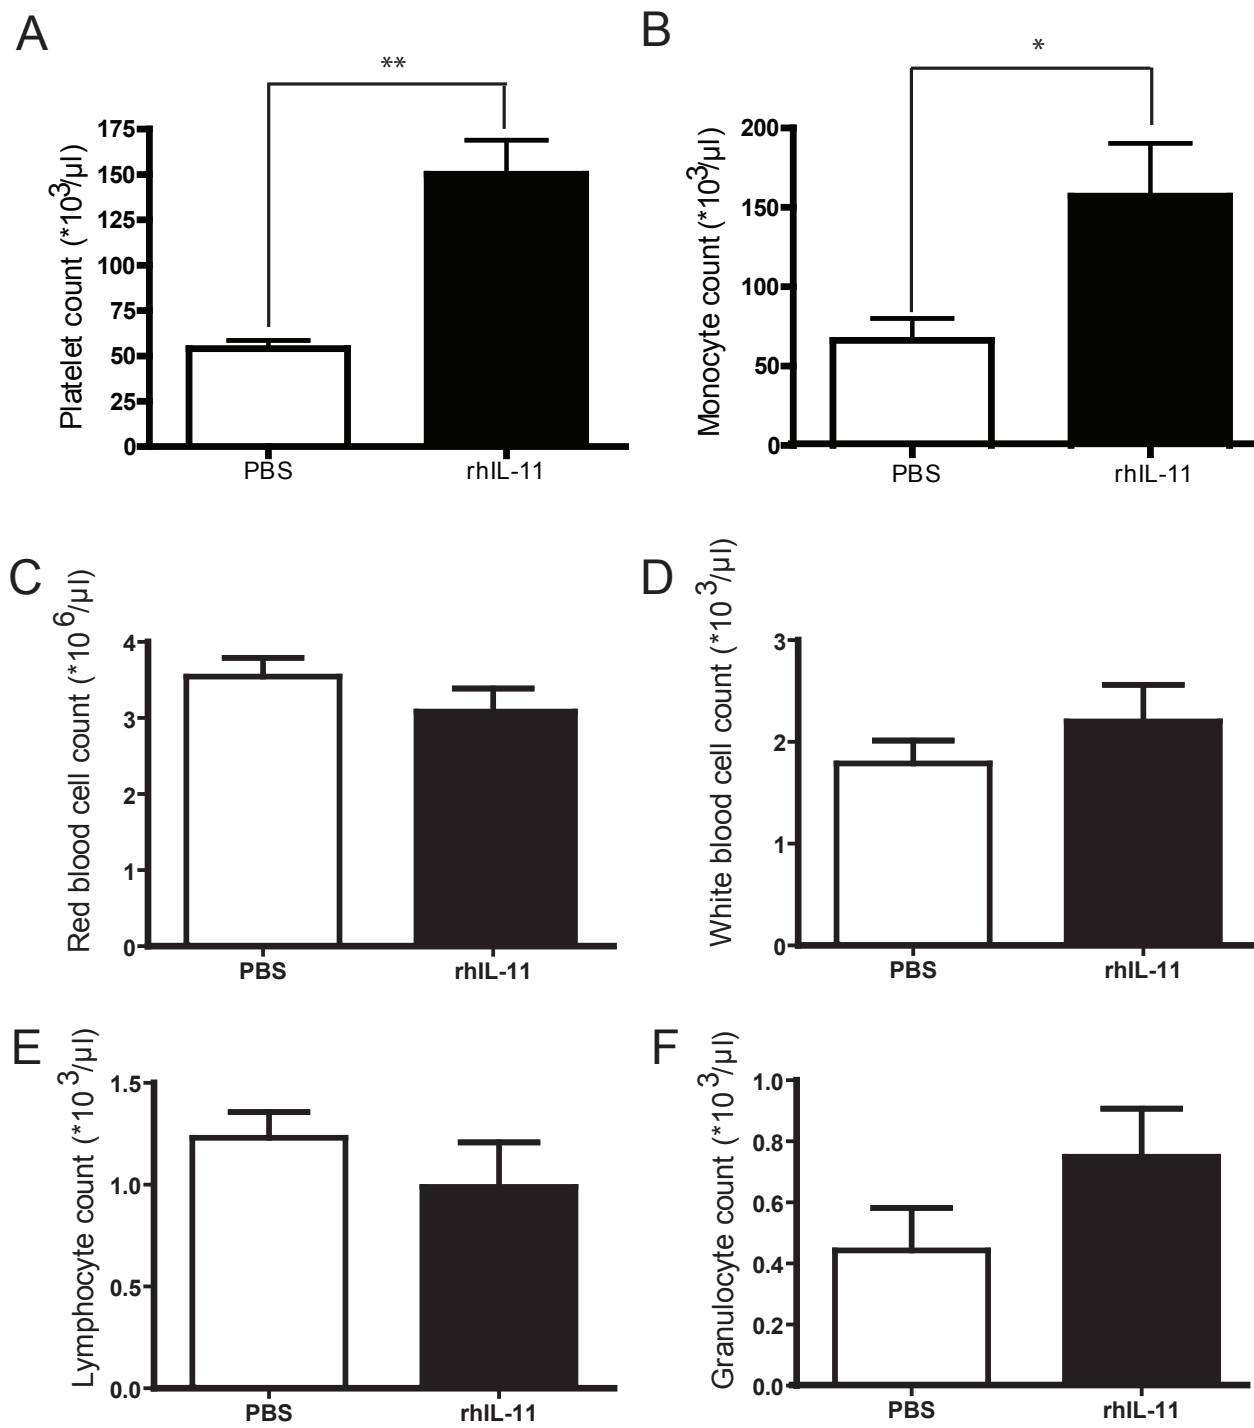

Supplement: NIHMS259654-supplement-4.pdf [file NIHMS259654-supplement-4.pdf]

Supplemental Figure VII

A

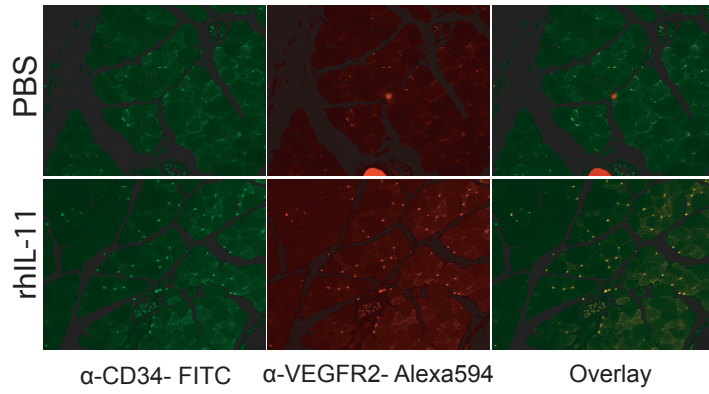

B

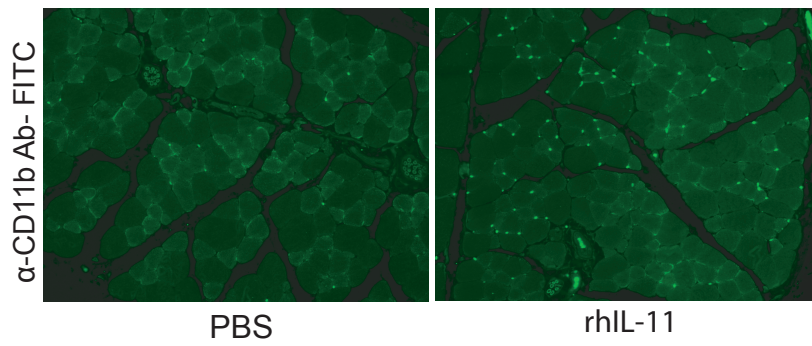

C

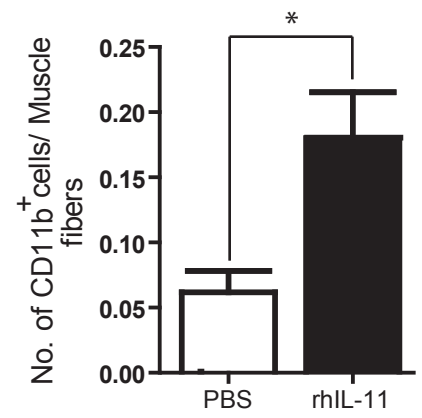

Supplement: NIHMS259654-supplement-8.pdf [file NIHMS259654-supplement-8.pdf]
